# Supplementary material for: Wildlife-vehicle collisions in Lanzarote Biosphere Reserve, Canary Islands
Source: PLoS One. 2018 Mar 21;13(3):e0192731. doi: 10.1371/journal.pone.0192731 (PMC5862401; doi:10.1371/journal.pone.0192731)
Supplement: S1 File — (CSV) [file pone.0192731.s003.csv]

Id	Year	Month	Date	Species	Group	coordX	coordY
1	2010	Noviembre	22/11/10	Sylvia conspicillata	Bird	650338	3230846
2	2010	Noviembre	22/11/10	Unidentified Bird	Bird	640492	3212483
3	2010	Noviembre	25/11/10	Tyto alba	Bird	637205	3209774
4	2010	Noviembre	25/11/10	Oryctolagus cuniculus	Mammal	639195	3210198
5	2010	Noviembre	25/11/10	Lanius meridionalis	Bird	643828	3209740
6	2010	Noviembre	25/11/10	Oryctolagus cuniculus	Mammal	643712	3209789
7	2010	Noviembre	25/11/10	Atelerix algirus	Mammal	643845	3209732
8	2010	Noviembre	25/11/10	Felis catus	Mammal	645684	3208154
9	2010	Noviembre	25/11/10	Unidentified Bird	Bird	642880	3206448
10	2010	Noviembre	25/11/10	Felis catus	Mammal	638150	3204158
11	2010	Noviembre	25/11/10	Oryctolagus cuniculus	Mammal	634784	3202736
12	2010	Noviembre	25/11/10	Atelerix algirus	Mammal	632592	3205321
13	2010	Noviembre	25/11/10	Bubulcus ibis	Bird	633175	3205985
14	2010	Diciembre	13/12/10	Tyto alba	Bird	636297	3212307
15	2010	Diciembre	13/12/10	Atelerix algirus	Mammal	636871	3212929
16	2010	Diciembre	13/12/10	Unidentified Mammal	Mammal	638452	3217323
17	2010	Diciembre	13/12/10	Atelerix algirus	Mammal	639356	3218628
18	2010	Diciembre	13/12/10	Anthus berthelotii	Bird	640554	3219716
19	2010	Diciembre	13/12/10	Falco tinnunculus	Bird	633889	3212813
20	2010	Diciembre	13/12/10	Oryctolagus cuniculus	Mammal	634198	3212277
21	2010	Diciembre	14/12/10	Atelerix algirus	Mammal	622753	3202327
22	2010	Diciembre	14/12/10	Unidentified Bird	Bird	621003	3203806
23	2010	Diciembre	14/12/10	Canis lupus familiaris	Mammal	613720	3196092
24	2010	Diciembre	14/12/10	Oryctolagus cuniculus	Mammal	634688	3203879
25	2010	Diciembre	14/12/10	Oryctolagus cuniculus	Mammal	628369	3202998
26	2010	Diciembre	14/12/10	Felis catus	Mammal	622567	3201977
27	2010	Diciembre	14/12/10	Oryctolagus cuniculus	Mammal	615468	3194517
28	2010	Diciembre	27/12/10	Lanius meridionalis	Bird	647050	3215820
29	2010	Diciembre	27/12/10	Felis catus	Mammal	649991	3224232
30	2010	Diciembre	27/12/10	Atelerix algirus	Mammal	651102	3225512
31	2010	Diciembre	27/12/10	Atelerix algirus	Mammal	639843	3214110
32	2010	Diciembre	31/11/10	Lanius meridionalis	Bird	643831	3209750
33	2010	Diciembre	31/11/10	Atelerix algirus	Mammal	642336	3209535
34	2010	Diciembre	31/11/10	Bubulcus ibis	Bird	643470	3206692
35	2010	Diciembre	31/11/10	Felis catus	Mammal	637898	3204114
36	2010	Diciembre	31/11/10	Felis catus	Mammal	631561	3200796
37	2011	Enero	16/01/11	Unidentified Bird	Bird	630043	3203644
38	2011	Enero	16/01/11	Columba livia	Bird	633187	3209673
39	2011	Enero	16/01/11	Atelerix algirus	Mammal	613964	3194351
40	2011	Enero	16/01/11	Felis catus	Mammal	639483	3205973
41	2011	Enero	16/01/11	Felis catus	Mammal	639483	3205973
42	2011	Enero	16/01/11	Felis catus	Mammal	634551	3203691
43	2011	Enero	16/01/11	Oryctolagus cuniculus	Mammal	613710	3197414
44	2011	Enero	16/01/11	Oryctolagus cuniculus	Mammal	613742	3195956
45	2011	Enero	16/01/11	Oryctolagus cuniculus	Mammal	638620	3206691
46	2011	Enero	16/01/11	Atelerix algirus	Mammal	613964	3194351
47	2011	Enero	16/01/11	Atelerix algirus	Mammal	633038	3209629
48	2011	Enero	16/01/11	Atelerix algirus	Mammal	637738	3215570
49	2011	Enero	16/01/11	Atelerix algirus	Mammal	638488	3217390
50	2011	Enero	16/01/11	Atelerix algirus	Mammal	635269	3210763
51	2011	Enero	16/01/11	Atelerix algirus	Mammal	637670	3213612
52	2011	Enero	30/01/11	Felis catus	Mammal	643291	3211758
53	2011	Enero	31/01/11	Upupa epops	Bird	640164	3208761
54	2011	Enero	31/01/11	Felis catus	Mammal	641279	3206616
55	2011	Enero	31/01/11	Atelerix algirus	Mammal	631308	3202612
56	2011	Enero	31/01/11	Felis catus	Mammal	634584	3208249
57	2011	Febrero	14/02/11	Felis catus	Mammal	634764	3211048
58	2011	Febrero	14/02/11	Atelerix algirus	Mammal	637784	3214928
59	2011	Febrero	16/02/11	Unidentified Bird	Bird	640699	3205530
60	2011	Febrero	16/02/11	Atelerix algirus	Mammal	635191	3209809
61	2011	Febrero	16/02/11	Felis catus	Mammal	627854	3202917
62	2011	Febrero	16/02/11	Felis catus	Mammal	638722	3206600
63	2011	Febrero	16/02/11	Felis catus	Mammal	613695	3197332
64	2011	Febrero	16/02/11	Oryctolagus cuniculus	Mammal	613762	3197693
65	2011	Febrero	03/03/11	Felis catus	Mammal	647950	3219501
66	2011	Febrero	03/03/11	Atelerix algirus	Mammal	651112	3225524
67	2011	Febrero	03/03/11	Atelerix algirus	Mammal	640419	3212642
68	2011	Marzo	04/03/11	Felis catus	Mammal	640811	3208953
69	2011	Marzo	04/03/11	Bubulcus ibis	Bird	639851	3208716
70	2011	Marzo	04/03/11	Felis catus	Mammal	639134	3210235
71	2011	Marzo	04/03/11	Oryctolagus cuniculus	Mammal	633202	3201806
72	2011	Marzo	04/03/11	Felis catus	Mammal	631304	3202620
73	2011	Marzo	18/03/11	Atelerix algirus	Mammal	623099	3203565
74	2011	Marzo	18/03/11	Atelerix algirus	Mammal	618203	3198161
75	2011	Marzo	18/03/11	Felis catus	Mammal	628582	3203028
76	2011	Marzo	18/03/11	Felis catus	Mammal	639486	3204852
77	2011	Marzo	18/03/11	Felis catus	Mammal	638881	3206465
78	2011	Marzo	18/03/11	Burhinus oedicnemus	Bird	618241	3198376
79	2011	Marzo	18/03/11	Oryctolagus cuniculus	Mammal	613734	3196050
80	2011	Marzo	18/03/11	Rattus sp.	Mammal	639128	3204199
81	2011	Marzo	29/03/11	Unidentified Bird	Bird	640996	3211664
82	2011	Marzo	29/03/11	Burhinus oedicnemus	Bird	638014	3209977
83	2011	Marzo	29/03/11	Felis catus	Mammal	635633	3203951
84	2011	Abril	06/04/11	Atelerix algirus	Mammal	637789	3214994
85	2011	Abril	07/04/11	Atelerix algirus	Mammal	620990	3203859
86	2011	Abril	07/04/11	Atelerix algirus	Mammal	624077	3201601
87	2011	Abril	07/04/11	Streptopelia decaocto	Bird	631590	3208692
88	2011	Abril	07/04/11	Streptopelia decaocto	Bird	635146	3209877
89	2011	Abril	07/04/11	Felis catus	Mammal	627860	3202919
90	2011	Abril	07/04/11	Felis catus	Mammal	638849	3206494
91	2011	Abril	07/04/11	Oryctolagus cuniculus	Mammal	626859	3202636
92	2011	Abril	26/04/11	Streptopelia decaocto	Bird	644548	3209422
93	2011	Abril	26/04/11	Felis catus	Mammal	631703	3200811
94	2011	Abril	26/04/11	Felis catus	Mammal	633090	3205908
95	2011	Abril	27/04/11	Felis catus	Mammal	646980	3217443
96	2011	Abril	27/04/11	Unidentified Mammal	Mammal	641030	3211604
97	2011	Abril	27/04/11	Atelerix algirus	Mammal	641479	3210647
98	2011	Mayo	09/05/11	Canis lupus familiaris	Mammal	634150	3212369
99	2011	Mayo	09/05/11	Oryctolagus cuniculus	Mammal	638536	3221272
100	2011	Mayo	09/05/11	Streptopelia decaocto	Bird	632870	3216811
101	2011	Mayo	11/05/11	Oryctolagus cuniculus	Mammal	615610	3201536
102	2011	Mayo	11/05/11	Columba livia	Bird	631055	3203897
103	2011	Mayo	11/05/11	Streptopelia decaocto	Bird	635677	3203945
104	2011	Mayo	11/05/11	Oryctolagus cuniculus	Mammal	613740	3195983
105	2011	Mayo	11/05/11	Burhinus oedicnemus	Bird	616856	3195830
106	2011	Mayo	11/05/11	Felis catus	Mammal	620046	3199908
107	2011	Mayo	11/05/11	Unidentified Bird	Bird	623623	3204073
108	2011	Mayo	11/05/11	Atelerix algirus	Mammal	635685	3208601
109	2011	Mayo	11/05/11	Passer hispaniolensis	Bird	635636	3208700
110	2011	Mayo	23/05/11	Unidentified Mammal	Mammal	640916	3209016
111	2011	Mayo	23/05/11	Felis catus	Mammal	638119	3204127
112	2011	Mayo	23/05/11	Felis catus	Mammal	631200	3200765
113	2011	Mayo	23/05/11	Oryctolagus cuniculus	Mammal	630844	3201697
114	2011	Mayo	23/05/11	Burhinus oedicnemus	Bird	633041	3205861
115	2011	Mayo	30/05/11	Atelerix algirus	Mammal	647114	3216575
116	2011	Mayo	30/05/11	Oryctolagus cuniculus	Mammal	647156	3218177
117	2011	Mayo	30/05/11	Atelerix algirus	Mammal	648781	3219816
118	2011	Mayo	30/05/11	Felis catus	Mammal	646962	3230210
119	2011	Mayo	30/05/11	Atelerix algirus	Mammal	646962	3230210
120	2011	Mayo	30/05/11	Columba livia	Bird	645827	3225562
121	2011	Mayo	30/05/11	Bubulcus ibis	Bird	643336	3216712
122	2011	Junio	15/06/11	Bubulcus ibis	Bird	637807	3214579
123	2011	Junio	15/06/11	Columba livia	Bird	639686	3221759
124	2011	Junio	15/06/11	Felis catus	Mammal	636871	3212938
125	2011	Junio	16/06/11	Atelerix algirus	Mammal	639431	3205842
126	2011	Junio	16/06/11	Unidentified Bird	Bird	620610	3204360
127	2011	Junio	16/06/11	Unidentified Bird	Bird	618972	3203642
128	2011	Junio	16/06/11	Atelerix algirus	Mammal	614694	3200575
129	2011	Junio	16/06/11	Unidentified Bird	Bird	614701	3200552
130	2011	Junio	16/06/11	Unidentified Bird	Bird	614430	3199854
131	2011	Junio	16/06/11	Unidentified Bird	Bird	614065	3198763
132	2011	Junio	16/06/11	Felis catus	Mammal	613866	3197972
133	2011	Junio	16/06/11	Atelerix algirus	Mammal	622960	3201964
134	2011	Junio	16/06/11	Atelerix algirus	Mammal	616048	3195058
135	2011	Junio	16/06/11	Felis catus	Mammal	619798	3199701
136	2011	Junio	29/06/11	Oryctolagus cuniculus	Mammal	643616	3212074
137	2011	Junio	29/06/11	Unidentified Mammal	Mammal	646720	3215430
138	2011	Junio	29/06/11	Atelerix algirus	Mammal	646888	3217852
139	2011	Junio	29/06/11	Larus michahellis	Bird	646725	3215434
140	2011	Junio	29/06/11	Felis catus	Mammal	646430	3228079
141	2011	Junio	29/06/11	Columba livia	Bird	641275	3215966
142	2011	Junio	29/06/11	Bubulcus ibis	Bird	641275	3215966
143	2011	Junio	29/06/11	Columba livia	Bird	640462	3215421
144	2011	Junio	29/06/11	Unidentified Bird	Bird	640715	3212087
145	2011	Junio	29/06/11	Felis catus	Mammal	641128	3211373
146	2011	Julio	14/07/11	Atelerix algirus	Mammal	622141	3201314
147	2011	Julio	14/07/11	Oryctolagus cuniculus	Mammal	616762	3195684
148	2011	Julio	14/07/11	Falco tinnunculus	Bird	627733	3206548
149	2011	Julio	14/07/11	Streptopelia decaocto	Bird	640037	3205508
150	2011	Julio	14/07/11	Streptopelia decaocto	Bird	635510	3209025
151	2011	Julio	14/07/11	Felis catus	Mammal	634447	3210135
152	2011	Julio	15/07/11	Unidentified Bird	Bird	634554	3211664
153	2011	Julio	15/07/11	Streptopelia decaocto	Bird	634816	3210948
154	2011	Julio	15/07/11	Atelerix algirus	Mammal	637819	3216234
155	2011	Julio	15/07/11	Atelerix algirus	Mammal	636320	3212395
156	2011	Julio	24/07/11	Bubulcus ibis	Bird	640638	3208886
157	2011	Julio	24/07/11	Burhinus oedicnemus	Bird	638115	3210023
158	2011	Julio	24/07/11	Unidentified Mammal	Mammal	644157	3207131
159	2011	Julio	24/07/11	Streptopelia decaocto	Bird	646126	3208968
160	2011	Julio	24/07/11	Streptopelia decaocto	Bird	642010	3206769
161	2011	Julio	24/07/11	Columba livia	Bird	642564	3206549
162	2011	Julio	24/07/11	Unidentified Mammal	Mammal	638625	3204138
163	2011	Julio	24/07/11	Oryctolagus cuniculus	Mammal	630906	3201842
164	2011	Julio	24/07/11	Oryctolagus cuniculus	Mammal	630678	3201355
165	2011	Julio	28/07/11	Felis catus	Mammal	643832	3212297
166	2011	Julio	28/07/11	Atelerix algirus	Mammal	645403	3214124
167	2011	Julio	28/07/11	Burhinus oedicnemus	Bird	646602	3215326
168	2011	Julio	28/07/11	Oryctolagus cuniculus	Mammal	646598	3215327
169	2011	Julio	28/07/11	Atelerix algirus	Mammal	646898	3215568
170	2011	Julio	28/07/11	Felis catus	Mammal	651163	3232907
171	2011	Julio	28/07/11	Atelerix algirus	Mammal	647127	3216589
172	2011	Julio	28/07/11	Atelerix algirus	Mammal	647148	3216480
173	2011	Julio	28/07/11	Oryctolagus cuniculus	Mammal	648031	3219595
174	2011	Julio	28/07/11	Oryctolagus cuniculus	Mammal	648449	3229511
175	2011	Julio	28/07/11	Oryctolagus cuniculus	Mammal	644909	3223840
176	2011	Agosto	04/08/11	Felis catus	Mammal	613730	3196259
177	2011	Agosto	04/08/11	Felis catus	Mammal	622983	3201935
178	2011	Agosto	04/08/11	Atelerix algirus	Mammal	629103	3203123
179	2011	Agosto	04/08/11	Oryctolagus cuniculus	Mammal	616981	3202282
180	2011	Agosto	04/08/11	Felis catus	Mammal	613732	3196007
181	2011	Agosto	04/08/11	Atelerix algirus	Mammal	616513	3195430
182	2011	Agosto	04/08/11	Oryctolagus cuniculus	Mammal	616774	3195744
183	2011	Agosto	04/08/11	Bulweria bulwerii	Bird	618095	3197751
184	2011	Agosto	04/08/11	Atelerix algirus	Mammal	618160	3197937
185	2011	Agosto	04/08/11	Felis catus	Mammal	618160	3197937
186	2011	Agosto	04/08/11	Oryctolagus cuniculus	Mammal	620499	3200348
187	2011	Agosto	04/08/11	Streptopelia decaocto	Bird	622395	3202756
188	2011	Agosto	15/08/11	Oryctolagus cuniculus	Mammal	633800	3214289
189	2011	Agosto	15/08/11	Burhinus oedicnemus	Bird	633973	3212669
190	2011	Agosto	15/08/11	Unidentified Mammal	Mammal	638825	3218024
191	2011	Agosto	15/08/11	Atelerix algirus	Mammal	635522	3210938
192	2011	Agosto	15/08/11	Oryctolagus cuniculus	Mammal	636887	3212953
193	2011	Agosto	16/08/11	Felis catus	Mammal	636661	3209666
194	2011	Agosto	16/08/11	Unidentified Mammal	Mammal	644309	3207207
195	2011	Agosto	31/08/11	Unidentified Bird	Bird	643347	3211803
196	2011	Agosto	31/08/11	Atelerix algirus	Mammal	646537	3215262
197	2011	Agosto	31/08/11	Oryctolagus cuniculus	Mammal	647111	3215957
198	2011	Agosto	31/08/11	Felis catus	Mammal	646993	3217639
199	2011	Agosto	31/08/11	Canis lupus familiaris	Mammal	647163	3216440
200	2011	Agosto	31/08/11	Atelerix algirus	Mammal	647153	3216479
201	2011	Agosto	31/08/11	Atelerix algirus	Mammal	647119	3216660
202	2011	Agosto	31/08/11	Atelerix algirus	Mammal	647060	3216923
203	2011	Agosto	31/08/11	Oryctolagus cuniculus	Mammal	647669	3219071
204	2011	Agosto	31/08/11	Oryctolagus cuniculus	Mammal	649149	3221578
205	2011	Agosto	31/08/11	Atelerix algirus	Mammal	648753	3228866
206	2011	Agosto	31/08/11	Oryctolagus cuniculus	Mammal	651752	3225993
207	2011	Agosto	31/08/11	Sylvia sp.	Bird	649257	3229716
208	2011	Agosto	31/08/11	Atelerix algirus	Mammal	648783	3220803
209	2011	Agosto	31/08/11	Oryctolagus cuniculus	Mammal	648588	3229693
210	2011	Agosto	31/08/11	Oryctolagus cuniculus	Mammal	648334	3230332
211	2011	Agosto	31/08/11	Atelerix algirus	Mammal	646682	3229573
212	2011	Agosto	31/08/11	Atelerix algirus	Mammal	640354	3212765
213	2011	Agosto	31/08/11	Unidentified Mammal	Mammal	640354	3212765
214	2011	Septiembre	13/09/11	Unidentified Mammal	Mammal	619535	3203815
215	2011	Septiembre	13/09/11	Canis lupus familiaris	Mammal	613654	3196724
216	2011	Septiembre	13/09/11	Oryctolagus cuniculus	Mammal	625284	3201764
217	2011	Septiembre	13/09/11	Felis catus	Mammal	634995	3203902
218	2011	Septiembre	13/09/11	Oryctolagus cuniculus	Mammal	618124	3202773
219	2011	Septiembre	13/09/11	Atelerix algirus	Mammal	613938	3194754
220	2011	Septiembre	13/09/11	Oryctolagus cuniculus	Mammal	616384	3195343
221	2011	Septiembre	13/09/11	Oryctolagus cuniculus	Mammal	617987	3197451
222	2011	Septiembre	13/09/11	Streptopelia decaocto	Bird	617987	3197451
223	2011	Septiembre	13/09/11	Unidentified Bird	Bird	631410	3203983
224	2011	Septiembre	13/09/11	Tyto alba	Bird	620337	3200185
225	2011	Septiembre	13/09/11	Felis catus	Mammal	639481	3204620
226	2011	Septiembre	15/09/11	Columba livia	Bird	633650	3214170
227	2011	Septiembre	15/09/11	Oryctolagus cuniculus	Mammal	633810	3213663
228	2011	Septiembre	15/09/11	Felis catus	Mammal	633764	3213280
229	2011	Septiembre	15/09/11	Atelerix algirus	Mammal	636003	3220507
230	2011	Octubre	13/10/11	Mustela putorius furo	Mammal	621775	3203063
231	2011	Octubre	13/10/11	Oryctolagus cuniculus	Mammal	620511	3204411
232	2011	Octubre	13/10/11	Unidentified Bird	Bird	618827	3203572
233	2011	Octubre	13/10/11	Unidentified Bird	Bird	617375	3202480
234	2011	Octubre	13/10/11	Unidentified Bird	Bird	627781	3202933
235	2011	Octubre	13/10/11	Felis catus	Mammal	627909	3202937
236	2011	Octubre	13/10/11	Charadrius hiaticula	Bird	619397	3199226
237	2011	Octubre	13/10/11	Charadrius sp.	Bird	613589	3196950
238	2011	Octubre	13/10/11	Felis catus	Mammal	621811	3200950
239	2011	Octubre	13/10/11	Unidentified Bird	Bird	615121	3194371
240	2011	Octubre	13/10/11	Unidentified Bird	Bird	614227	3198610
241	2011	Octubre	13/10/11	Unidentified Mammal	Mammal	624324	3201579
242	2011	Octubre	13/10/11	Felis catus	Mammal	635345	3204435
243	2011	Octubre	13/10/11	Felis catus	Mammal	628595	3203043
244	2011	Octubre	14/10/11	Larus michahellis	Bird	638108	3216700
245	2011	Octubre	14/10/11	Felis catus	Mammal	638895	3218081
246	2011	Octubre	14/10/11	Atelerix algirus	Mammal	640578	3220302
247	2011	Octubre	14/10/11	Burhinus oedicnemus	Bird	640573	3220369
248	2011	Octubre	14/10/11	Burhinus oedicnemus	Bird	639279	3221525
249	2011	Octubre	27/10/11	Burhinus oedicnemus	Bird	640994	3211621
250	2011	Octubre	27/10/11	Felis catus	Mammal	641449	3210788
251	2011	Octubre	27/10/11	Oryctolagus cuniculus	Mammal	641449	3210728
252	2011	Octubre	31/10/11	Atelerix algirus	Mammal	644788	3209565
253	2011	Octubre	31/10/11	Felis catus	Mammal	640482	3208799
254	2011	Octubre	31/10/11	Felis catus	Mammal	630640	3201410
255	2011	Octubre	31/10/11	Oryctolagus cuniculus	Mammal	633384	3201910
256	2011	Noviembre	15/11/11	Oryctolagus cuniculus	Mammal	632875	3216789
257	2011	Noviembre	15/11/11	Atelerix algirus	Mammal	633741	3213259
258	2011	Noviembre	15/11/11	Atelerix algirus	Mammal	634893	3210759
259	2011	Noviembre	16/11/11	Oryctolagus cuniculus	Mammal	624483	3201566
260	2011	Noviembre	16/11/11	Felis catus	Mammal	628624	3203037
261	2011	Noviembre	16/11/11	Felis catus	Mammal	628624	3203037
262	2011	Noviembre	16/11/11	Oryctolagus cuniculus	Mammal	613665	3197366
263	2011	Noviembre	16/11/11	Oryctolagus cuniculus	Mammal	634844	3210596
264	2010	Noviembre	20/11/10	Felis catus	Mammal	623031	3203439
265	2010	Noviembre	20/11/10	Oryctolagus cuniculus	Mammal	633165	3203787
266	2010	Noviembre	20/11/10	Felis catus	Mammal	637184	3204073
267	2010	Noviembre	21/11/10	Felis catus	Mammal	638759	3217867
268	2010	Noviembre	21/11/10	Oryctolagus cuniculus	Mammal	638962	3221379
269	2010	Noviembre	21/11/10	Falco tinnunculus	Bird	638759	3217867
270	2010	Noviembre	21/11/10	Bubulcus ibis	Bird	637944	3221088
271	2010	Noviembre	21/11/10	Burhinus oedicnemus	Bird	636604	3212729
272	2010	Noviembre	21/11/10	Burhinus oedicnemus	Bird	637798	3214783
273	2010	Noviembre	21/11/10	Felis catus	Mammal	633825	3214249
274	2010	Noviembre	21/11/10	Atelerix algirus	Mammal	639709	3218869
275	2010	Diciembre	11/12/10	Canis lupus familiaris	Mammal	639312	3209917
276	2010	Diciembre	11/12/10	Erithacus rubecula	Bird	641627	3209043
277	2010	Diciembre	11/12/10	Atelerix algirus	Mammal	644190	3207695
278	2010	Diciembre	11/12/10	Streptopelia sp.	Bird	640877	3208972
279	2010	Diciembre	11/12/10	Oryctolagus cuniculus	Mammal	641339	3209063
280	2010	Diciembre	11/12/10	Atelerix algirus	Mammal	641047	3209103
281	2010	Diciembre	12/12/10	Atelerix algirus	Mammal	644198	3218143
282	2010	Diciembre	12/12/10	Felis catus	Mammal	641744	3209155
283	2010	Diciembre	12/12/10	Atelerix algirus	Mammal	642633	3211280
284	2010	Diciembre	12/12/10	Atelerix algirus	Mammal	641433	3210709
285	2010	Diciembre	12/12/10	Sylvia conspicillata	Bird	644237	3223632
286	2010	Diciembre	12/12/10	Felis catus	Mammal	641468	3210709
287	2010	Diciembre	28/12/10	Streptopelia sp.	Bird	631061	3203905
288	2010	Diciembre	28/12/10	Felis catus	Mammal	632645	3203959
289	2010	Diciembre	28/12/10	Felis catus	Mammal	629195	3203244
290	2010	Diciembre	28/12/10	Canis lupus familiaris	Mammal	635616	3203922
291	2010	Diciembre	28/12/10	Lanius meridionalis	Bird	635963	3208074
292	2010	Diciembre	28/12/10	Felis catus	Mammal	638860	3206477
293	2010	Diciembre	28/12/10	Oryctolagus cuniculus	Mammal	638652	3206654
294	2010	Diciembre	28/12/10	Atelerix algirus	Mammal	634287	3219553
295	2010	Diciembre	28/12/10	Bubulcus ibis	Bird	636244	3212108
296	2011	Enero	12/01/11	Atelerix algirus	Mammal	642292	3209511
297	2011	Enero	12/01/11	Streptopelia sp.	Bird	640256	3208772
298	2011	Enero	12/01/11	Bubulcus ibis	Bird	643459	3206671
299	2011	Enero	12/01/11	Lanius meridionalis	Bird	630885	3200846
300	2011	Enero	12/01/11	Upupa epops	Bird	639499	3204301
301	2011	Enero	15/01/11	Felis catus	Mammal	649978	3224191
302	2011	Enero	15/01/11	Falco tinnunculus	Bird	647512	3210012
303	2011	Enero	15/01/11	Oryctolagus cuniculus	Mammal	646984	3217626
304	2011	Enero	15/01/11	Felis catus	Mammal	646995	3217200
305	2011	Enero	15/01/11	Atelerix algirus	Mammal	639887	3214287
306	2011	Enero	15/01/11	Streptopelia turtur	Bird	644489	3218974
307	2011	Enero	15/01/11	Atelerix algirus	Mammal	645697	3224514
308	2011	Enero	23/01/11	Falco tinnunculus	Bird	633697	3203681
309	2011	Enero	23/01/11	Felis catus	Mammal	627198	3202721
310	2011	Enero	23/01/11	Oryctolagus cuniculus	Mammal	620575	3200428
311	2011	Enero	23/01/11	Atelerix algirus	Mammal	640553	3219524
312	2011	Enero	23/01/11	Upupa epops	Bird	640569	3219915
313	2011	Enero	23/01/11	Burhinus oedicnemus	Bird	640119	3219153
314	2011	Febrero	06/02/11	Atelerix algirus	Mammal	641349	3210925
315	2011	Febrero	06/02/11	Anthus berthelotii	Bird	644851	3223647
316	2011	Febrero	06/02/11	Upupa epops	Bird	640163	3208754
317	2011	Febrero	06/02/11	Oryctolagus cuniculus	Mammal	642170	3206753
318	2011	Febrero	06/02/11	Oryctolagus cuniculus	Mammal	633097	3201695
319	2011	Febrero	15/02/11	Falco tinnunculus	Bird	614857	3200848
320	2011	Febrero	15/02/11	Felis catus	Mammal	638762	3206560
321	2011	Febrero	15/02/11	Atelerix algirus	Mammal	637787	3214885
322	2011	Marzo	08/03/11	Oryctolagus cuniculus	Mammal	652559	3227109
323	2011	Marzo	08/03/11	Atelerix algirus	Mammal	640306	3212858
324	2011	Marzo	08/03/11	Upupa epops	Bird	640606	3215654
325	2011	Marzo	08/03/11	Burhinus oedicnemus	Bird	637419	3209822
326	2011	Marzo	08/03/11	Larus michahellis	Bird	639865	3208719
327	2011	Marzo	08/03/11	Atelerix algirus	Mammal	640822	3208944
328	2011	Marzo	08/03/11	Passer hispaniolensis	Bird	635219	3203991
329	2011	Marzo	16/03/11	Passer hispaniolensis	Bird	624183	3201579
330	2011	Marzo	16/03/11	Columba livia	Bird	625261	3201763
331	2011	Marzo	16/03/11	Oryctolagus cuniculus	Mammal	616193	3195184
332	2011	Marzo	16/03/11	Bucanetes githagineus	Bird	615233	3194444
333	2011	Marzo	16/03/11	Burhinus oedicnemus	Bird	632982	3209585
334	2011	Marzo	16/03/11	Burhinus oedicnemus	Bird	631425	3208610
335	2011	Marzo	17/03/11	Atelerix algirus	Mammal	634726	3211380
336	2011	Marzo	17/03/11	Atelerix algirus	Mammal	638160	3214011
337	2011	Marzo	17/03/11	Atelerix algirus	Mammal	638825	3217990
338	2011	Abril	10/04/11	Passerine	Bird	647074	3216844
339	2011	Abril	10/04/11	Atelerix algirus	Mammal	642800	3211392
340	2011	Abril	10/04/11	Streptopelia turtur	Bird	640962	3211718
341	2011	Abril	10/04/11	Atelerix algirus	Mammal	640997	3211650
342	2011	Abril	10/04/11	Atelerix algirus	Mammal	640921	3211821
343	2011	Abril	10/04/11	Felis catus	Mammal	644268	3218150
344	2011	Abril	10/04/11	Bubulcus ibis	Bird	639537	3209252
345	2011	Abril	10/04/11	Bubulcus ibis	Bird	639529	3209237
346	2011	Abril	10/04/11	Atelerix algirus	Mammal	640057	3208739
347	2011	Abril	10/04/11	Atelerix algirus	Mammal	634268	3207804
348	2011	Abril	16/04/11	Columba livia	Bird	630451	3203712
349	2011	Abril	16/04/11	Atelerix algirus	Mammal	629014	3203129
350	2011	Abril	16/04/11	Canis lupus familiaris	Mammal	626870	3202645
351	2011	Abril	16/04/11	Burhinus oedicnemus	Bird	625625	3202096
352	2011	Abril	16/04/11	Bubulcus ibis	Bird	625040	3201653
353	2011	Abril	16/04/11	Atelerix algirus	Mammal	624499	3201563
354	2011	Abril	16/04/11	Atelerix algirus	Mammal	622248	3202687
355	2011	Abril	16/04/11	Atelerix algirus	Mammal	617928	3197301
356	2011	Abril	16/04/11	Passer hispaniolensis	Bird	630868	3208346
357	2011	Abril	16/04/11	Columba livia	Bird	638745	3206560
358	2011	Abril	16/04/11	Felis catus	Mammal	635408	3209273
359	2011	Abril	16/04/11	Streptopelia sp.	Bird	635146	3209889
360	2011	Abril	16/04/11	Upupa epops	Bird	634346	3212033
361	2011	Abril	16/04/11	Canis lupus familiaris	Mammal	633786	3213017
362	2011	Abril	16/04/11	Passer hispaniolensis	Bird	633790	3213006
363	2011	Mayo	08/05/11	Felis catus	Mammal	646985	3217422
364	2011	Mayo	08/05/11	Felis catus	Mammal	647021	3217064
365	2011	Mayo	08/05/11	Columba livia	Bird	647163	3216389
366	2011	Mayo	08/05/11	Oryctolagus cuniculus	Mammal	646795	3229076
367	2011	Mayo	08/05/11	Oryctolagus cuniculus	Mammal	636149	3209464
368	2011	Mayo	08/05/11	Felis catus	Mammal	639516	3209037
369	2011	Mayo	08/05/11	Felis catus	Mammal	642043	3209309
370	2011	Mayo	08/05/11	Felis catus	Mammal	633081	3201670
371	2011	Mayo	08/05/11	Burhinus oedicnemus	Bird	632552	3205258
372	2011	Mayo	27/05/11	Passerine	Bird	635440	3203973
373	2011	Mayo	27/05/11	Atelerix algirus	Mammal	632738	3203961
374	2011	Mayo	27/05/11	Streptopelia sp.	Bird	632680	3203961
375	2011	Mayo	27/05/11	Atelerix algirus	Mammal	631122	3203937
376	2011	Mayo	27/05/11	Felis catus	Mammal	631014	3203886
377	2011	Mayo	27/05/11	Atelerix algirus	Mammal	623026	3201937
378	2011	Mayo	27/05/11	Larus michahellis	Bird	616696	3202105
379	2011	Mayo	27/05/11	Chlamydotis undulata	Bird	616498	3195428
380	2011	Mayo	27/05/11	Felis catus	Mammal	636043	3208019
381	2011	Mayo	27/05/11	Streptopelia sp.	Bird	635514	3209031
382	2011	Mayo	27/05/11	Streptopelia sp.	Bird	635109	3210014
383	2011	Mayo	27/05/11	Felis catus	Mammal	635033	3210194
384	2011	Mayo	27/05/11	Atelerix algirus	Mammal	632911	3215766
385	2011	Mayo	27/05/11	Burhinus oedicnemus	Bird	636276	3220622
386	2011	Mayo	27/05/11	Larus michahellis	Bird	639059	3218367
387	2011	Mayo	27/05/11	Atelerix algirus	Mammal	638039	3216575
388	2011	Mayo	27/05/11	Burhinus oedicnemus	Bird	636881	3212939
389	2011	Junio	16/06/11	Burhinus oedicnemus	Bird	650811	3225303
390	2011	Junio	16/06/11	Oryctolagus cuniculus	Mammal	649247	3222155
391	2011	Junio	16/06/11	Oryctolagus cuniculus	Mammal	647012	3217778
392	2011	Junio	16/06/11	Felis catus	Mammal	646306	3215041
393	2011	Junio	16/06/11	Burhinus oedicnemus	Bird	645562	3214281
394	2011	Junio	16/06/11	Oryctolagus cuniculus	Mammal	646834	3228880
395	2011	Junio	16/06/11	Atelerix algirus	Mammal	646794	3229078
396	2011	Junio	16/06/11	Oryctolagus cuniculus	Mammal	646791	3229085
397	2011	Junio	16/06/11	Atelerix algirus	Mammal	646955	3230231
398	2011	Junio	16/06/11	Oryctolagus cuniculus	Mammal	641169	3211321
399	2011	Junio	16/06/11	Streptopelia sp.	Bird	641177	3211308
400	2011	Junio	16/06/11	Felis catus	Mammal	641217	3211218
401	2011	Junio	16/06/11	Lanius meridionalis	Bird	642264	3216211
402	2011	Junio	16/06/11	Bubulcus ibis	Bird	643330	3216714
403	2011	Junio	16/06/11	Burhinus oedicnemus	Bird	643450	3217012
404	2011	Junio	16/06/11	Atelerix algirus	Mammal	640487	3208801
405	2011	Junio	16/06/11	Felis catus	Mammal	642380	3209593
406	2011	Junio	16/06/11	Larus michahellis	Bird	644077	3209652
407	2011	Junio	16/06/11	Oryctolagus cuniculus	Mammal	644083	3209648
408	2011	Junio	16/06/11	Unidentified Bird	Bird	645018	3209110
409	2011	Junio	16/06/11	Oryctolagus cuniculus	Mammal	643921	3206972
410	2011	Junio	16/06/11	Unidentified Bird	Bird	643841	3206918
411	2011	Junio	16/06/11	Felis catus	Mammal	641946	3206769
412	2011	Junio	16/06/11	Oryctolagus cuniculus	Mammal	636007	3203985
413	2011	Junio	16/06/11	Passer hispaniolensis	Bird	631371	3202717
414	2011	Junio	16/06/11	Oryctolagus cuniculus	Mammal	631011	3202056
415	2011	Junio	16/06/11	Atelerix algirus	Mammal	632574	3205294
416	2011	Junio	16/06/11	Oryctolagus cuniculus	Mammal	632888	3205753
417	2011	Junio	02/07/11	Felis catus	Mammal	633445	3203721
418	2011	Junio	02/07/11	Felis catus	Mammal	632582	3203968
419	2011	Junio	02/07/11	Atelerix algirus	Mammal	632600	3203962
420	2011	Junio	02/07/11	Columba livia	Bird	631399	3203981
421	2011	Junio	02/07/11	Passerine	Bird	628811	3203057
422	2011	Junio	02/07/11	Lanius meridionalis	Bird	628630	3203040
423	2011	Junio	02/07/11	Larus michahellis	Bird	625342	3201792
424	2011	Junio	02/07/11	Passerine	Bird	625334	3201808
425	2011	Junio	02/07/11	Atelerix algirus	Mammal	625057	3201671
426	2011	Junio	02/07/11	Atelerix algirus	Mammal	624879	3201576
427	2011	Junio	02/07/11	Passerine	Bird	617429	3196447
428	2011	Junio	02/07/11	Felis catus	Mammal	614710	3200565
429	2011	Junio	02/07/11	Atelerix algirus	Mammal	613857	3195138
430	2011	Junio	02/07/11	Passerine	Bird	613709	3196230
431	2011	Junio	02/07/11	Atelerix algirus	Mammal	621169	3200773
432	2011	Junio	02/07/11	Passerine	Bird	614429	3199821
433	2011	Junio	02/07/11	Felis catus	Mammal	618614	3203189
434	2011	Junio	02/07/11	Columba livia	Bird	632862	3209465
435	2011	Junio	02/07/11	Atelerix algirus	Mammal	633025	3209616
436	2011	Junio	02/07/11	Felis catus	Mammal	634178	3209910
437	2011	Junio	02/07/11	Oryctolagus cuniculus	Mammal	636342	3220642
438	2011	Junio	02/07/11	Atelerix algirus	Mammal	640203	3221557
439	2011	Junio	02/07/11	Atelerix algirus	Mammal	639775	3218933
440	2011	Junio	02/07/11	Atelerix algirus	Mammal	638115	3216715
441	2011	Junio	02/07/11	Larus fuscus	Bird	636333	3220638
442	2011	Junio	02/07/11	Burhinus oedicnemus	Bird	638650	3221311
443	2011	Junio	02/07/11	Chlamydotis undulata	Bird	633457	3218149
444	2011	Junio	02/07/11	Bubulcus ibis	Bird	636903	3212957
445	2011	Julio	10/07/11	Columba livia	Bird	647166	3216409
446	2011	Julio	10/07/11	Columba livia	Bird	647168	3216386
447	2011	Julio	10/07/11	Felis catus	Mammal	641842	3210563
448	2011	Julio	10/07/11	Oryctolagus cuniculus	Mammal	648592	3229980
449	2011	Julio	10/07/11	Oryctolagus cuniculus	Mammal	641463	3210700
450	2011	Julio	10/07/11	Alectoris barbara	Bird	644599	3221257
451	2011	Julio	10/07/11	Anthus berthelotii	Bird	644498	3221883
452	2011	Julio	10/07/11	Atelerix algirus	Mammal	638032	3207269
453	2011	Julio	10/07/11	Larus michahellis	Bird	639860	3208717
454	2011	Julio	10/07/11	Passer hispaniolensis	Bird	640179	3208762
455	2011	Julio	10/07/11	Passer hispaniolensis	Bird	640207	3208750
456	2011	Julio	10/07/11	Unidentified Bird	Bird	643218	3209893
457	2011	Julio	10/07/11	Felis catus	Mammal	644443	3209493
458	2011	Julio	10/07/11	Alectoris barbara	Bird	643520	3206715
459	2011	Julio	24/07/11	Oryctolagus cuniculus	Mammal	633055	3203846
460	2011	Julio	24/07/11	Felis catus	Mammal	628923	3203089
461	2011	Julio	24/07/11	Burhinus oedicnemus	Bird	625947	3202216
462	2011	Julio	24/07/11	Oryctolagus cuniculus	Mammal	625262	3201777
463	2011	Julio	24/07/11	Rattus sp.	Mammal	624534	3201557
464	2011	Julio	24/07/11	Atelerix algirus	Mammal	624170	3201592
465	2011	Julio	24/07/11	Atelerix algirus	Mammal	623513	3201696
466	2011	Julio	24/07/11	Tyto alba	Bird	614276	3199356
467	2011	Julio	24/07/11	Oryctolagus cuniculus	Mammal	613679	3197330
468	2011	Julio	24/07/11	Burhinus oedicnemus	Bird	613656	3196766
469	2011	Julio	24/07/11	Bulweria bulwerii	Bird	618034	3202820
470	2011	Julio	24/07/11	Atelerix algirus	Mammal	619667	3203998
471	2011	Julio	24/07/11	Atelerix algirus	Mammal	619705	3204049
472	2011	Julio	24/07/11	Felis catus	Mammal	619813	3199688
473	2011	Julio	24/07/11	Atelerix algirus	Mammal	617645	3196779
474	2011	Julio	24/07/11	Atelerix algirus	Mammal	616500	3195442
475	2011	Julio	24/07/11	Atelerix algirus	Mammal	613926	3194453
476	2011	Julio	24/07/11	Atelerix algirus	Mammal	622903	3202882
477	2011	Julio	24/07/11	Felis catus	Mammal	627049	3206489
478	2011	Julio	24/07/11	Unidentified Bird	Bird	638620	3206693
479	2011	Julio	24/07/11	Bubulcus ibis	Bird	638133	3207087
480	2011	Julio	24/07/11	Atelerix algirus	Mammal	638059	3207148
481	2011	Julio	24/07/11	Bubulcus ibis	Bird	635507	3209040
482	2011	Julio	24/07/11	Streptopelia sp.	Bird	633809	3213564
483	2011	Julio	24/07/11	Atelerix algirus	Mammal	634137	3219295
484	2011	Julio	24/07/11	Upupa epops	Bird	634878	3219875
485	2011	Julio	24/07/11	Lanius meridionalis	Bird	635716	3220342
486	2011	Julio	24/07/11	Atelerix algirus	Mammal	636592	3220734
487	2011	Julio	24/07/11	Larus michahellis	Bird	640137	3219179
488	2011	Agosto	06/08/11	Atelerix algirus	Mammal	647017	3230457
489	2011	Agosto	06/08/11	Atelerix algirus	Mammal	639939	3213836
490	2011	Agosto	06/08/11	Oryctolagus cuniculus	Mammal	644272	3212911
491	2011	Agosto	06/08/11	Lanius meridionalis	Bird	640077	3213472
492	2011	Agosto	06/08/11	Felis catus	Mammal	641544	3210523
493	2011	Agosto	06/08/11	Atelerix algirus	Mammal	640822	3211988
494	2011	Agosto	06/08/11	Felis catus	Mammal	648578	3229682
495	2011	Agosto	06/08/11	Streptopelia sp.	Bird	642233	3210957
496	2011	Agosto	06/08/11	Rattus sp.	Mammal	646345	3227068
497	2011	Agosto	06/08/11	Atelerix algirus	Mammal	641437	3210756
498	2011	Agosto	06/08/11	Atelerix algirus	Mammal	644678	3219606
499	2011	Agosto	06/08/11	Alectoris barbara	Bird	642960	3216685
500	2011	Agosto	06/08/11	Atelerix algirus	Mammal	639970	3213731
501	2011	Agosto	06/08/11	Atelerix algirus	Mammal	640059	3213536
502	2011	Agosto	06/08/11	Passer hispaniolensis	Bird	640177	3215088
503	2011	Agosto	06/08/11	Larus michahellis	Bird	644582	3221229
504	2011	Agosto	06/08/11	Atelerix algirus	Mammal	640902	3215833
505	2011	Agosto	13/08/11	Bubulcus ibis	Bird	639507	3209153
506	2011	Agosto	13/08/11	Felis catus	Mammal	641451	3206743
507	2011	Agosto	13/08/11	Streptopelia sp.	Bird	640313	3208783
508	2011	Agosto	13/08/11	Atelerix algirus	Mammal	640443	3208402
509	2011	Agosto	13/08/11	Atelerix algirus	Mammal	633125	3201720
510	2011	Agosto	13/08/11	Tyto alba	Bird	639940	3208718
511	2011	Agosto	13/08/11	Passerine	Bird	641189	3209090
512	2011	Agosto	13/08/11	Bubulcus ibis	Bird	639530	3209414
513	2011	Agosto	13/08/11	Felis catus	Mammal	642223	3206739
514	2011	Agosto	13/08/11	Streptopelia sp.	Bird	640666	3208848
515	2011	Agosto	13/08/11	Oryctolagus cuniculus	Mammal	632824	3205684
516	2011	Agosto	13/08/11	Atelerix algirus	Mammal	632982	3205826
517	2011	Agosto	13/08/11	Felis catus	Mammal	636719	3209674
518	2011	Agosto	13/08/11	Unidentified Mammal	Mammal	641798	3206769
519	2011	Agosto	13/08/11	Felis catus	Mammal	636062	3203991
520	2011	Agosto	13/08/11	Felis catus	Mammal	643502	3209872
521	2011	Agosto	30/08/11	Oryctolagus cuniculus	Mammal	629817	3203586
522	2011	Agosto	30/08/11	Atelerix algirus	Mammal	629055	3203175
523	2011	Agosto	30/08/11	Rattus sp.	Mammal	628835	3203068
524	2011	Agosto	30/08/11	Lanius meridionalis	Bird	628904	3203095
525	2011	Agosto	30/08/11	Atelerix algirus	Mammal	628636	3203042
526	2011	Agosto	30/08/11	Atelerix algirus	Mammal	627138	3202722
527	2011	Agosto	30/08/11	Passer hispaniolensis	Bird	627107	3202710
528	2011	Agosto	30/08/11	Oryctolagus cuniculus	Mammal	626474	3202505
529	2011	Agosto	30/08/11	Passerine	Bird	626369	3202437
530	2011	Agosto	30/08/11	Atelerix algirus	Mammal	626302	3202413
531	2011	Agosto	30/08/11	Oryctolagus cuniculus	Mammal	625698	3202133
532	2011	Agosto	30/08/11	Oryctolagus cuniculus	Mammal	625176	3201715
533	2011	Agosto	30/08/11	Oryctolagus cuniculus	Mammal	623900	3201622
534	2011	Agosto	30/08/11	Alectoris barbara	Bird	623435	3201737
535	2011	Agosto	30/08/11	Felis catus	Mammal	621853	3200933
536	2011	Agosto	30/08/11	Oryctolagus cuniculus	Mammal	621208	3200806
537	2011	Agosto	30/08/11	Felis catus	Mammal	620352	3200399
538	2011	Agosto	30/08/11	Felis catus	Mammal	613728	3196242
539	2011	Agosto	30/08/11	Felis catus	Mammal	618106	3202741
540	2011	Agosto	30/08/11	Atelerix algirus	Mammal	618066	3202697
541	2011	Agosto	30/08/11	Felis catus	Mammal	622043	3201079
542	2011	Agosto	30/08/11	Atelerix algirus	Mammal	618199	3198179
543	2011	Agosto	30/08/11	Columba livia	Bird	615377	3194559
544	2011	Agosto	30/08/11	Passerine	Bird	627747	3206545
545	2011	Agosto	30/08/11	Passerine	Bird	627760	3206545
546	2011	Agosto	30/08/11	Passerine	Bird	627982	3206621
547	2011	Agosto	30/08/11	Larus michahellis	Bird	637928	3207244
548	2011	Agosto	01/09/11	Streptopelia sp.	Bird	633771	3213326
549	2011	Agosto	01/09/11	Felis catus	Mammal	633436	3214638
550	2011	Agosto	01/09/11	Passerine	Bird	640556	3219793
551	2011	Agosto	01/09/11	Atelerix algirus	Mammal	640564	3219782
552	2011	Agosto	01/09/11	Lanius meridionalis	Bird	640557	3219723
553	2011	Agosto	01/09/11	Passerine	Bird	637826	3214388
554	2011	Agosto	01/09/11	Atelerix algirus	Mammal	637790	3214838
555	2011	Agosto	01/09/11	Bucanetes githagineus	Bird	637793	3214788
556	2011	Agosto	01/09/11	Atelerix algirus	Mammal	635120	3220013
557	2011	Agosto	01/09/11	Atelerix algirus	Mammal	633195	3217664
558	2011	Agosto	01/09/11	Atelerix algirus	Mammal	633241	3217729
559	2011	Agosto	01/09/11	Atelerix algirus	Mammal	638118	3221154
560	2011	Agosto	01/09/11	Callandrella rufescens	Bird	638523	3221273
561	2011	Agosto	01/09/11	Callandrella rufescens	Bird	638523	3221273
562	2011	Agosto	01/09/11	Callandrella rufescens	Bird	638533	3221278
563	2011	Septiembre	11/09/11	Burhinus oedicnemus	Bird	651138	3232921
564	2011	Septiembre	11/09/11	Oryctolagus cuniculus	Mammal	653337	3231488
565	2011	Septiembre	11/09/11	Atelerix algirus	Mammal	649225	3221973
566	2011	Septiembre	11/09/11	Felis catus	Mammal	649220	3221965
567	2011	Septiembre	11/09/11	Felis catus	Mammal	649228	3221951
568	2011	Septiembre	11/09/11	Canis lupus familiaris	Mammal	649169	3221698
569	2011	Septiembre	11/09/11	Lanius meridionalis	Bird	647143	3218159
570	2011	Septiembre	11/09/11	Atelerix algirus	Mammal	646172	3226146
571	2011	Septiembre	11/09/11	Atelerix algirus	Mammal	646707	3229638
572	2011	Septiembre	11/09/11	Oryctolagus cuniculus	Mammal	646965	3230191
573	2011	Septiembre	11/09/11	Lanius meridionalis	Bird	648597	3229717
574	2011	Septiembre	11/09/11	Atelerix algirus	Mammal	641429	3210783
575	2011	Septiembre	11/09/11	Lanius meridionalis	Bird	641360	3210898
576	2011	Septiembre	11/09/11	Streptopelia sp.	Bird	640989	3211669
577	2011	Septiembre	11/09/11	Atelerix algirus	Mammal	640550	3212376
578	2011	Septiembre	11/09/11	Atelerix algirus	Mammal	640569	3212337
579	2011	Septiembre	11/09/11	Passerine	Bird	640544	3212391
580	2011	Septiembre	11/09/11	Passerine	Bird	640527	3212432
581	2011	Septiembre	11/09/11	Passerine	Bird	640341	3212817
582	2011	Septiembre	11/09/11	Atelerix algirus	Mammal	640357	3212763
583	2011	Septiembre	11/09/11	Passerine	Bird	644273	3218152
584	2011	Septiembre	11/09/11	Oryctolagus cuniculus	Mammal	644571	3221402
585	2011	Septiembre	14/09/11	Bubulcus ibis	Bird	639509	3209123
586	2011	Septiembre	14/09/11	Oryctolagus cuniculus	Mammal	640002	3208726
587	2011	Septiembre	14/09/11	Oryctolagus cuniculus	Mammal	643643	3209829
588	2011	Septiembre	14/09/11	Alectoris barbara	Bird	643556	3209868
589	2011	Septiembre	14/09/11	Burhinus oedicnemus	Bird	633601	3206730
590	2011	Septiembre	14/09/11	Oryctolagus cuniculus	Mammal	633196	3206005
591	2011	Septiembre	01/10/11	Oryctolagus cuniculus	Mammal	635320	3203978
592	2011	Septiembre	01/10/11	Passerine	Bird	634365	3203729
593	2011	Septiembre	01/10/11	Felis catus	Mammal	633839	3203716
594	2011	Septiembre	01/10/11	Passerine	Bird	633822	3203696
595	2011	Septiembre	01/10/11	Atelerix algirus	Mammal	632492	3203985
596	2011	Septiembre	01/10/11	Passerine	Bird	631473	3203985
597	2011	Septiembre	01/10/11	Oryctolagus cuniculus	Mammal	629213	3203265
598	2011	Septiembre	01/10/11	Unidentified Mammal	Mammal	622839	3202019
599	2011	Septiembre	01/10/11	Falco tinnunculus	Bird	626734	3202587
600	2011	Septiembre	01/10/11	Felis catus	Mammal	614554	3199748
601	2011	Septiembre	01/10/11	Streptopelia sp.	Bird	613818	3195748
602	2011	Septiembre	01/10/11	Atelerix algirus	Mammal	621945	3202999
603	2011	Septiembre	01/10/11	Columba livia	Bird	617109	3202282
604	2011	Septiembre	01/10/11	Felis catus	Mammal	621633	3200944
605	2011	Septiembre	01/10/11	Felis catus	Mammal	620556	3200415
606	2011	Septiembre	01/10/11	Oryctolagus cuniculus	Mammal	617757	3196925
607	2011	Septiembre	01/10/11	Atelerix algirus	Mammal	616501	3195439
608	2011	Septiembre	01/10/11	Columba livia	Bird	616562	3195476
609	2011	Septiembre	01/10/11	Felis catus	Mammal	633757	3213283
610	2011	Septiembre	01/10/11	Felis catus	Mammal	633774	3213321
611	2011	Septiembre	01/10/11	Columba livia	Bird	633812	3213628
612	2011	Octubre	12/10/11	Phylloscopus trochilus	Bird	650941	3233058
613	2011	Octubre	12/10/11	Oryctolagus cuniculus	Mammal	652665	3231886
614	2011	Octubre	12/10/11	Motacilla flava	Bird	648207	3219794
615	2011	Octubre	12/10/11	Passerine	Bird	647958	3219509
616	2011	Octubre	12/10/11	Passerine	Bird	647981	3219507
617	2011	Octubre	12/10/11	Passerine	Bird	647616	3219009
618	2011	Octubre	12/10/11	Ficedula hypoleuca	Bird	643117	3211653
619	2011	Octubre	12/10/11	Oryctolagus cuniculus	Mammal	649821	3230761
620	2011	Octubre	12/10/11	Felis catus	Mammal	641423	3210799
621	2011	Octubre	12/10/11	Atelerix algirus	Mammal	641428	3210783
622	2011	Octubre	12/10/11	Ficedula hypoleuca	Bird	641295	3211067
623	2011	Octubre	12/10/11	Passerine	Bird	641272	3211099
624	2011	Octubre	12/10/11	Atelerix algirus	Mammal	641096	3211469
625	2011	Octubre	12/10/11	Phylloscopus trochilus	Bird	640736	3212097
626	2011	Octubre	12/10/11	Oryctolagus cuniculus	Mammal	640359	3212772
627	2011	Octubre	12/10/11	Oryctolagus cuniculus	Mammal	640248	3212993
628	2011	Octubre	12/10/11	Atelerix algirus	Mammal	639999	3213705
629	2011	Octubre	12/10/11	Passerine	Bird	638016	3209978
630	2011	Octubre	12/10/11	Tyto alba	Bird	637087	3209761
631	2011	Octubre	12/10/11	Felis catus	Mammal	644330	3209532
632	2011	Octubre	12/10/11	Oryctolagus cuniculus	Mammal	644317	3209540
633	2011	Octubre	12/10/11	Phylloscopus trochilus	Bird	631111	3202299
634	2011	Octubre	12/10/11	Atelerix algirus	Mammal	632169	3204893
635	2011	Octubre	12/10/11	Passerine	Bird	632169	3204893
636	2011	Octubre	12/10/11	Passerine	Bird	632197	3204900
637	2011	Octubre	23/10/11	Felis catus	Mammal	631340	3203987
638	2011	Octubre	23/10/11	Passerine	Bird	620575	3204343
639	2011	Octubre	23/10/11	Bucanetes githagineus	Bird	616668	3202140
640	2011	Octubre	23/10/11	Oryctolagus cuniculus	Mammal	621179	3200746
641	2011	Octubre	23/10/11	Passerine	Bird	620323	3200165
642	2011	Octubre	23/10/11	Atelerix algirus	Mammal	620156	3199993
643	2011	Octubre	23/10/11	Passer hispaniolensis	Bird	619845	3199729
644	2011	Octubre	23/10/11	Ficedula hypoleuca	Bird	619758	3199662
645	2011	Octubre	23/10/11	Felis catus	Mammal	618952	3198860
646	2011	Octubre	23/10/11	Passerine	Bird	624768	3204987
647	2011	Octubre	23/10/11	Oryctolagus cuniculus	Mammal	633909	3212771
648	2011	Octubre	23/10/11	Upupa epops	Bird	633771	3213353
649	2011	Octubre	23/10/11	Burhinus oedicnemus	Bird	640573	3220341
650	2011	Octubre	23/10/11	Burhinus oedicnemus	Bird	638946	3218199
651	2011	Octubre	23/10/11	Streptopelia sp.	Bird	632914	3216992
652	2011	Octubre	23/10/11	Ficedula hypoleuca	Bird	636800	3212882
653	2011	Noviembre	06/11/11	Felis catus	Mammal	641429	3210789
654	2011	Noviembre	06/11/11	Atelerix algirus	Mammal	641185	3211284
655	2011	Noviembre	06/11/11	Burhinus oedicnemus	Bird	641016	3211619
656	2011	Noviembre	06/11/11	Erithacus rubecula	Bird	640115	3213330
657	2011	Noviembre	06/11/11	Sylvia conspicillata	Bird	643457	3216699
658	2011	Noviembre	06/11/11	Passerine	Bird	644316	3218168
659	2011	Noviembre	06/11/11	Oryctolagus cuniculus	Mammal	644588	3223481
660	2011	Noviembre	06/11/11	Streptopelia sp.	Bird	645902	3224961
661	2011	Noviembre	06/11/11	Felis catus	Mammal	640501	3208811
662	2011	Noviembre	06/11/11	Lanius meridionalis	Bird	642521	3209699
663	2011	Noviembre	06/11/11	Oryctolagus cuniculus	Mammal	633838	3202088
664	2011	Noviembre	06/11/11	Oryctolagus cuniculus	Mammal	632530	3201151
665	2011	Noviembre	06/11/11	Bubulcus ibis	Bird	633514	3206339
666	2011	Noviembre	06/11/11	Burhinus oedicnemus	Bird	633595	3206401
